# Supplementary material
Source: publisher figshare collection journal article supplement (https://gsapubs.figshare.com/ndownloader/files/23296424)
Supplement: Supplementary file 1 [file 23296424]

## Sheet: Sheet1
	16O	18O	18O/	18O/	δ18O		comments
	cps	cps	16O	16O
				1 s.e.		1 s.e.
mount 1
AS3_E30@1	2261492000	4563248	0.00201581	9.73343e-08	5.29278	0.0482854
AS3_E30@2	2254584000	4548453	0.00201543	1.4113e-07	5.10396	0.0700244
AS3_E30@3	2249245000	4538410	0.00201576	1.54298e-07	5.26488	0.0765459
AS3_E30@4	2249223000	4537985	0.00201559	1.15683e-07	5.18068	0.0573944
AS3_E30@5	2213762000	4468441	0.00201649	1.26147e-07	5.63107	0.0625577
E30_3027_z@1	2220764000	4464550	0.00200838	1.95837e-07	1.58708	0.0975099
E30_3027_z@2	2230468000	4486182	0.00200933	1.18497e-07	2.06188	0.0589733
E30_3027_z@3	2207837000	4443831	0.00201077	1.36205e-07	2.77681	0.0677377
E30_3027_z@4	2210121000	4447888	0.00201052	1.46411e-07	2.65425	0.0728223
E30_3027_z@5	1506696000	3023401	0.00200466	1.65462e-07	-0.267757	0.0825384	too close to rim, replicated
E30_3027_z@6	2190768000	4405682	0.00200904	1.28977e-07	1.91391	0.0641983
E30_3027_z@7	2172693000	4369039	0.0020089	1.76784e-07	1.84665	0.0880003
91500_E30@1	2186408000	4431755	0.00202496	1.24531e-07	9.85291	0.0614979
91500_E30@2	2174378000	4407375	0.00202496	1.85854e-07	9.8539	0.0917818
91500_E30@3	2197685000	4452598	0.00202404	1.56497e-07	9.39605	0.0773192
91500_E30@4	2200034000	4457983	0.00202432	1.59465e-07	9.53754	0.0787745
91500_E30@5	2209442000	4477218	0.0020244	1.14236e-07	9.5764	0.0564293
E30_3027_z@5R	2156651000	4338379	0.00200964	1.9638e-07	2.21533	0.0977187	replicate
E30_3027_z@8	2137116000	4322982	0.00202082	1.43755e-07	7.78732	0.0711373	xenocryst
E30_3027_z@9	2024724000	4063875	0.00200515	2.2682e-07	-0.0266226	0.113119	beam overlap onto 16O spot
E30_3027_z@10	2170358000	4367585	0.00201039	1.71618e-07	2.59048	0.0853652
E30_3027_z@11	2161414000	4348163	0.00200974	1.56337e-07	2.26216	0.0777898
E30_3027_z@12	2152383000	4326603	0.00200816	1.29714e-07	1.47698	0.0645935
E30_3027_z@13	2160275000	4343359	0.00200858	1.82188e-07	1.68324	0.090705
E30_3027_z@14	2124911000	4272746	0.00200881	1.47463e-07	1.79783	0.0734083
AS3_E30@6	2188953000	4415991	0.00201541	1.24751e-07	5.091	0.0618984
AS3_E30@7	2187879000	4414314	0.00201563	1.42906e-07	5.2026	0.0708991
AS3_E30@8	2180793000	4400121	0.00201568	1.3554e-07	5.22652	0.067243
AS3_E30@9	2179587000	4398482	0.00201604	1.26298e-07	5.40737	0.0626464
AS3_E30@10	2159334000	4357977	0.00201621	1.74732e-07	5.49256	0.0866635
E30_3027_z@15	2025020000	4091380	0.00201842	1.30511e-07	6.59311	0.0646599	xenocryst
E30_3027_z@16	2075811000	4176051	0.00200978	2.97503e-07	2.28508	0.148028
E30_3027_z@17	2094986000	4216420	0.00201064	1.46175e-07	2.71205	0.0727006
E30_3027_z@18	2076005000	4190264	0.00201644	1.2351e-07	5.60317	0.0612519	xenocryst
E30_3027_z@19	2061449000	4159450	0.00201574	1.58558e-07	5.25641	0.0786602	xenocryst
E30_3027_z@20	1952599000	3928947	0.00201018	1.65667e-07	2.48237	0.0824141
E30_3027_z@21	2104980000	4233878	0.00200938	1.72398e-07	2.0833	0.0857967
E30_3027_z@22	2081294000	4185481	0.00200902	1.20983e-07	1.90295	0.0602202
E30_3027_z@23	2080055000	4181612	0.00200835	1.98869e-07	1.57264	0.0990208
91500_E30@6	2121217000	4298601	0.00202448	1.58021e-07	9.61426	0.078055
91500_E30@7	2121720000	4299846	0.00202459	1.75075e-07	9.66807	0.0864747
91500_E30@8	2085988000	4227158	0.00202445	1.12262e-07	9.60181	0.0554529
91500_E30@9	2081265000	4217385	0.00202436	1.69053e-07	9.55398	0.0835097
91500_E30@10	2076198000	4207798	0.00202468	1.33209e-07	9.7169	0.0657927
AS3_E30@11	2048384000	4137186	0.00201774	1.94245e-07	6.25333	0.0962684
AS3_E30@12	2046196000	4129985	0.00201638	1.61118e-07	5.57576	0.0799048
mount 2
AS3_M203_201@1	2750488000	5551715	0.00201531	1.42991e-07	5.04123	0.0709525
AS3_M203_201@2	2703832000	5457434	0.00201527	1.60227e-07	5.02131	0.0795065
M203_3921@1	2709743000	5468792	0.00201506	1.28717e-07	4.91625	0.0638776
M203_3921@2	2468007000	4982820	0.00201583	2.13558e-07	5.29915	0.105941
M203_3921@3	1641705000	3296474	0.00200483	3.55287e-07	-0.182038	0.177215	too close to rim, replicated
M203_3921@4	2663346000	5377149	0.00201581	1.14394e-07	5.28919	0.0567485
M203_3921@5	2179353000	4374429	0.00200409	2.32399e-07	-0.552496	0.115962	too close to rim, replicated
M203_3921@6	2582940000	5210393	0.0020141	2.3228e-07	4.43674	0.115327
AS3_M203_201@3	2719867000	5491995	0.00201608	1.17825e-07	5.42364	0.0584426
AS3_M203_201@4	2708349000	5472785	0.00201757	1.39544e-07	6.16754	0.0691645
M203_3921@7	2670648000	5395459	0.00201714	1.36701e-07	5.95443	0.0677699
M203_3921@8	2429416000	4893494	0.00201114	1.31859e-07	2.96039	0.0655644
M203_3921@9	2653161000	5362459	0.00201802	1.77963e-07	6.39111	0.0881872
M203_3921@10	2555754000	5152700	0.00201298	3.03243e-07	3.88105	0.150644
M203_3921@11	2372613000	4778399	0.00201085	1.51674e-07	2.81798	0.0754275
M203_3921@12	2582165000	5224865	0.0020203	1.38051e-07	7.52887	0.068332
AS3_M203_201@5	2513698000	5013596	0.00199141	1.66068e-07	-6.87768	0.083392
AS3_M203_201@6	2663527000	5378959	0.00201635	1.32699e-07	5.55907	0.0658115
M203_3954@1	2688007000	5417193	0.00201219	2.32589e-07	3.48371	0.11559
M203_3954@2	2664232000	5377055	0.0020151	1.3307e-07	4.93716	0.0660366
M203_3954@3	2413541000	4863774	0.00201207	1.62719e-07	3.42545	0.0808712
M203_3954@4	2596801000	5225599	0.00200919	7.9003e-07	1.98943	0.393208	too close to rim, replicated
M203_3954@5	2586759000	5225754	0.00201705	1.27616e-07	5.91111	0.0632686
M203_3954@6	2648942000	5349590	0.00201638	1.35671e-07	5.57501	0.0672842
AS3_M203_201@7	2655316000	5358570	0.00201492	1.97772e-07	4.84504	0.0981538
AS3_M203_201@8	2599603000	5251202	0.00201686	1.23263e-07	5.8155	0.0611162
M203_3954@7	2546646000	5144660	0.00201703	1.60257e-07	5.89965	0.079452
M203_3954@8	2651882000	5343298	0.00201178	2.10593e-07	3.27906	0.10468
M203_3954@9	2369381000	4781327	0.00201483	1.58869e-07	4.80073	0.0788499
M203_3954@10	2338233000	4715131	0.0020134	1.96697e-07	4.08919	0.0976938
M203_3954@11	2227764000	4492046	0.00201326	1.72185e-07	4.01749	0.0855258
M203_3954@12	2404536000	4846126	0.00201228	1.08753e-07	3.52902	0.0540447
M203_3954@13	2277173000	4591854	0.00201334	1.51757e-07	4.05782	0.075376
M203_3954@14	1644551000	3297849	0.0020022	2.28821e-07	-1.49707	0.114285	too close to rim, replicated
M203_3954@15	2045088000	4110293	0.00200671	3.1285e-07	0.751577	0.155902	too close to rim, replicated
AS3_M203_201@9	2594492000	5236985	0.00201536	1.57731e-07	5.06811	0.0782641
AS3_M203_201@10	2697416000	5444190	0.00201516	1.11989e-07	4.96704	0.0555733
M203_3987@1	2359565000	4741531	0.00200637	2.35072e-07	0.58278	0.117163	too close to rim, replicated
M203_3987@2	2537701000	5133801	0.00201987	1.43847e-07	7.31427	0.0712163
M203_3987@3	1998727000	4030324	0.00201331	2.72525e-07	4.04487	0.135362
M203_3987@4	2719942000	5482240	0.00201244	2.52994e-07	3.60968	0.125715
M203_3987@5	2134210000	4308482	0.00201563	1.70286e-07	5.20256	0.0844827
M203_3987@6	2715169000	5477016	0.00201405	1.08678e-07	4.41583	0.0539599
AS3_M203_201@11	2692498000	5438275	0.00201665	8.12199e-08	5.70895	0.0402747
AS3_M203_201@12	2706060000	5462240	0.00201538	1.23267e-07	5.07807	0.0611629
M203_3987@7	2532536000	5115232	0.00201667	1.41433e-07	5.71791	0.0701321
M203_3987@8	2728894000	5512209	0.0020168	1.89501e-07	5.78563	0.093961
M203_3987@9	2127250000	4293693	0.00201529	1.68294e-07	5.03127	0.0835084
M203_3987@10	2700357000	5454020	0.0020166	1.32166e-07	5.68505	0.0655388
M203_3987@11	2749573000	5563888	0.0020204	1.13538e-07	7.58066	0.0561956
M203_3987@12	2727299000	5508009	0.00201644	1.32656e-07	5.60737	0.065787
M203_3987@13	2660190000	5375969	0.00201775	1.38011e-07	6.26115	0.0683983
M203_3987@14	2715046000	5483285	0.00201645	1.37124e-07	5.61086	0.0680027
AS3_M203_201@13	2703187000	5459068	0.00201635	1.08568e-07	5.56206	0.0538438
AS3_M203_201@14	2697639000	5445103	0.00201533	1.48373e-07	5.05268	0.0736219
M201_3080@1	2718478000	5486119	0.00201495	1.21406e-07	4.86098	0.0602526
M201_3080@2	2710302000	5472814	0.00201612	1.53525e-07	5.44803	0.0761486
M201_3080@3	2743686000	5543894	0.00201746	9.66019e-08	6.11376	0.0478829
M201_3080@4	2686805000	5437644	0.00202069	1.39243e-07	7.72307	0.0689088
M201_3080@5	1828372000	3693169	0.00201678	2.1326e-07	5.77617	0.105743
M201_3080@6	2718393000	5493251	0.00201763	1.87623e-07	6.19891	0.0929915
AS3_M203_201@15	2752191000	5553422	0.00201468	1.97965e-07	4.72803	0.0982613
AS3_M203_201@16	2737378000	5525369	0.00201535	9.40428e-08	5.06264	0.0466632
M201_3080@7	2638412000	5336504	0.00201948	1.52519e-07	7.11908	0.0755241
M201_3080@8	2742458000	5543987	0.0020184	9.94924e-08	6.58082	0.0492928
M201_3080@9	2705413000	5442444	0.00200856	1.65405e-07	1.67523	0.0823498	too close to rim, replicated
M201_3080@10	2425492000	4927062	0.00202821	1.27323e-07	11.4769	0.062776
M201_3080@11	2689958000	5436775	0.002018	1.35454e-07	6.38115	0.0671232
M201_3080@12	2687453000	5424869	0.00201545	1.43982e-07	5.11293	0.071439
AS3_M203_201@17	2701897000	5454247	0.00201553	1.48087e-07	5.15376	0.0734731
AS3_M203_201@18	2686273000	5424962	0.00201637	1.55497e-07	5.57152	0.077117
M203_3921@3R	2624074000	5295550	0.00201493	1.81355e-07	4.85102	0.0900059
M203_3921@5R	2729590000	5499793	0.00201175	2.49404e-07	3.26412	0.123974
M203_3954@4R	2709537000	5446861	0.00200714	7.12103e-07	0.966184	0.354785
M203_3954@14R	2717673000	5489926	0.00201694	1.90908e-07	5.85584	0.094652
M203_3954@15R	2552922000	5149241	0.00201386	1.86021e-07	4.32023	0.0923701
M203_3987@1R	2638189000	5326284	0.00201578	8.66329e-08	5.27525	0.0429774
M201_3080@9R	2535611000	5092267	0.00200518	1.40808e-07	-0.0122444	0.0702223
AS3_M203_201@19	2767966000	5587652	0.00201555	1.03449e-07	5.15973	0.0513257
AS3_M203_201@20	2712153000	5476418	0.00201607	1.14445e-07	5.42314	0.0567663
M201_3080@13	2606814000	5255040	0.00201275	1.3977e-07	3.76603	0.0694425
M201_3080@14	2764897000	5580945	0.00201536	8.50766e-08	5.06762	0.0422141
mount 3
AS3_CP@1	1.8814e-09	2.08837e-09	0.00201455	5.95261e-07	5.05679	0.295481
AS3_CP@2	2.04205e-09	2.10649e-09	0.00201397	5.02313e-07	4.77042	0.249414
AS3_CP@3	2.07427e-09	2.12462e-09	0.00201483	3.72273e-07	5.19499	0.184767
CP0904_oxy_g3@1	2.08233e-09	2.12865e-09	0.00201422	4.15459e-07	4.89016	0.206263
CP0904_oxy_g3@2	2.11052e-09	2.13066e-09	0.002012	5.13643e-07	3.7861	0.255289
AS3_CP@4	2.11455e-09	2.14274e-09	0.00201518	4.69761e-07	5.3721	0.233111
AS3_CP@5	2.10649e-09	2.1508e-09	0.00201612	4.99353e-07	5.84156	0.24768
AS3_CP@6	2.10045e-09	2.14677e-09	0.00201605	3.54693e-07	5.80414	0.175935
mount 4
AS3_RC2@1.ais	4094972000	8247912	0.00201417	1.71018e-07	5.45425	0.0849076
AS3_RC2@2.ais	4089035000	8236198	0.00201424	2.14165e-07	5.4877	0.106326
AS3_RC2@3.ais	4104296000	8266613	0.00201415	1.49941e-07	5.44177	0.0744439
AS3_RC2@4.ais	4145553000	8351083	0.0020145	2.15835e-07	5.61799	0.107141
RC_z@13.ais	4141072000	8340190	0.00201403	1.6747e-07	5.38337	0.0831518
RC_z@14.ais	4128537000	8314022	0.0020138	1.50466e-07	5.27105	0.0747172
RC_z@15.ais	4099613000	8264033	0.00201583	1.6123e-07	6.28141	0.0799823
RC_z@16.ais	3996442000	8056025	0.00201579	3.17718e-07	6.26144	0.157615
RC_z@17.ais	4147459000	8366781	0.00201734	2.16494e-07	7.03918	0.107316
RC_z@18.ais	4164897000	8392639	0.00201511	1.88937e-07	5.92249	0.0937604
AS3_RC2@5.ais	4199967000	8456875	0.00201357	1.72806e-07	5.15424	0.0858205
AS3_RC2@6.ais	4162080000	8381431	0.00201379	2.16239e-07	5.26206	0.10738
AS3_RC2@7.ais	4180457000	8417337	0.00201351	1.6611e-07	5.19916	0.0824978
AS3_RC2@8.ais	4133616000	8323450	0.00201361	1.17362e-07	5.25157	0.0582843
RC_z@19.ais	4130166000	8322448	0.00201504	2.18703e-07	5.96297	0.108536
RC_z@21.ais	4102196000	8265236	0.00201485	2.01898e-07	5.86812	0.100205
RC_z@52.ais	4094276000	8244202	0.00201362	2.12844e-07	5.25357	0.105702
RC_z@29.ais	4058308000	8173634	0.00201407	2.25388e-07	5.47922	0.111907
RC_z@27.ais	4067484000	8196041	0.00201504	1.91176e-07	5.96197	0.0948744
RC_z@25.ais	4031038000	8139535	0.00201923	2.14684e-07	8.05673	0.10632
AS3_RC2@9.ais	4123494000	8304661	0.00201401	1.91534e-07	5.44927	0.0951007
AS3_RC2@10.ais	4124217000	8306916	0.00201419	1.6425e-07	5.53913	0.0815463
AS3_RC2@11.ais	4133381000	8323873	0.00201383	1.40923e-07	5.23318	0.0699776
AS3_RC2@12.ais	4188715000	8435286	0.00201382	1.80965e-07	5.22819	0.0898613
RC_z@34.ais	4063211000	8187567	0.00201506	1.81282e-07	5.84615	0.0899634
RC_z@32.ais	4053779000	8162901	0.00201366	1.50535e-07	5.14732	0.0747569
RC_z@45.ais	4040400000	8138219	0.00201422	1.52959e-07	5.42486	0.0759397
RC_z@51.ais	3939140000	7937316	0.00201501	1.78108e-07	5.8202	0.0883909
RC_z@50.ais	3940376000	7954820	0.00201882	2.20193e-07	7.72151	0.10907
AS3_RC2@13.ais	4116253000	8289820	0.00201394	1.66266e-07	5.28459	0.0825577
AS3_RC2@14.ais	4066737000	8191954	0.0020144	2.04969e-07	5.5187	0.101752
AS3_RC2@15.ais	4126172000	8309470	0.00201386	1.90957e-07	5.24865	0.0948211
AS3_RC2@16.ais	4108125000	8274968	0.00201431	1.7319e-07	5.47278	0.0859799
sample locations see DR Tables 1 and 2
